# Supplementary material for: A new “turn-on” molecular switch for idiosyncratic detection of Al3+ ion along with its application in live cell imaging
Source: Royal Society of Chemistry journal article supplement (doi:10.1039/d2nj03481f), 2022-01-01
Supplement: d2nj03481f1.pdf [file d2nj03481f1.pdf]

## *Supporting Information*

### **A new “turn-on” molecular switch for idiosyncratic detection of Al<sup>3+</sup> ion along with its application in live cell imaging**

**Amitav Biswas,<sup>[a]</sup> Rahul Naskar,<sup>[a]</sup> Debarpan Mitra,<sup>[b]</sup> Akash Das,<sup>[a]</sup> Saswati Gharami,<sup>[a]</sup> Nabendu Murmu<sup>[b]</sup> and Tapan Kumar Mondal\*<sup>[a]</sup>**

<sup>[a]</sup> Department of Chemistry, Jadavpur University, Kolkata-700032.

<sup>[b]</sup> Department of Signal Transduction and Biogenic Amines (STBA), Chittaranjan National Cancer Institute, Kolkata- 700026, India.

## **CONTENTS**

- Fig. S1:** IR spectra of the probe HBTC
- Fig. S2:** <sup>1</sup>H NMR (300 MHz) spectrum of HBTC in DMSO-d<sub>6</sub>
- Fig. S3:** <sup>13</sup>C NMR spectrum of HBTC in DMSO-d<sub>6</sub>
- Fig. S4:** HRMS of probe HBTC
- Fig. S5:** <sup>1</sup>H NMR spectrum of the HBTC with Al<sup>3+</sup> in DMSO-d<sub>6</sub>
- Fig. S6:** HRMS spectrum of HBTC-Al<sup>3+</sup> complex
- Fig. S7:** UV-Vis spectra of HBTC (20 μM) in presence of 40 μM various metal
- Fig. S8:** Job's plot for HBTC with Al<sup>3+</sup> in 10 mM HEPES buffer solution (pH = 7.2)
- Fig. S9:** Benesi–Hildebrand plot from fluorescence titration data of HBTC (20 μM) with Al<sup>3+</sup>
- Fig. S10:** Linear response curve of HBTC at 480 nm depending on the Al<sup>3+</sup> concentration
- Fig. S11:** Optimized structure of HBTC by DFT/B3LYP/6-31+G(d) method
- Fig. S12:** Optimized structure of HBTC-Al<sup>3+</sup> complex by DFT/B3LYP method
- Fig. S13:** Contour plot of some selected molecular orbitals of HBTC
- Fig. S14:** Contour plot of some selected molecular orbitals of HBTC-Al<sup>3+</sup>
- Fig. S15:** MTT assay of HBTC on breast cancer cell lines (MDA-MB231)
- Fig. S16:** IC<sub>50</sub> dose of the receptor HBTC in breast cancer cell lines (MDA-MB231)

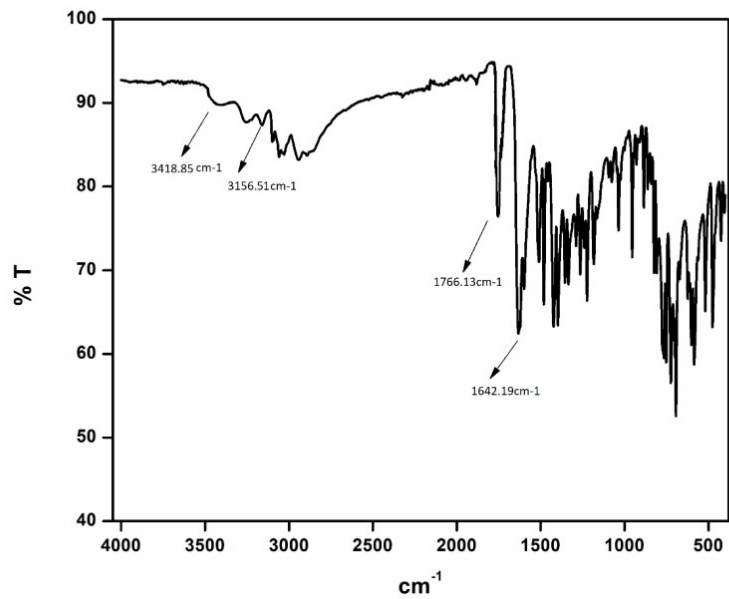

**Fig. S1:** IR spectra of the probe HBTC

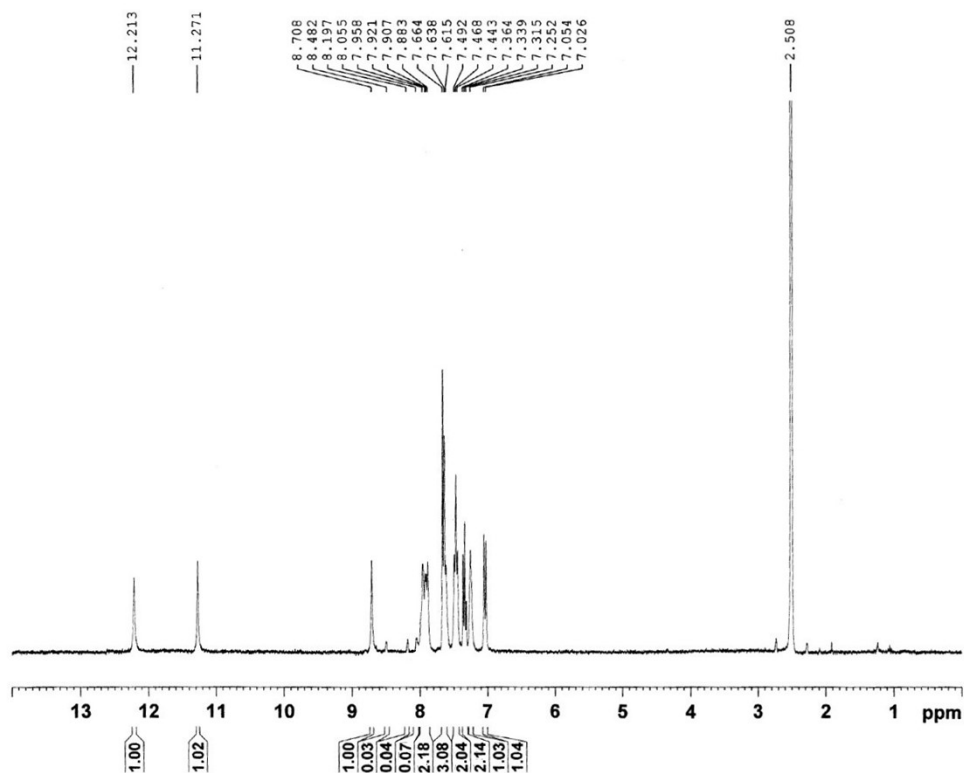

**Fig. S2:**  $^1\text{H}$  NMR (300 MHz) spectrum of HBTC in  $\text{DMSO-d}_6$

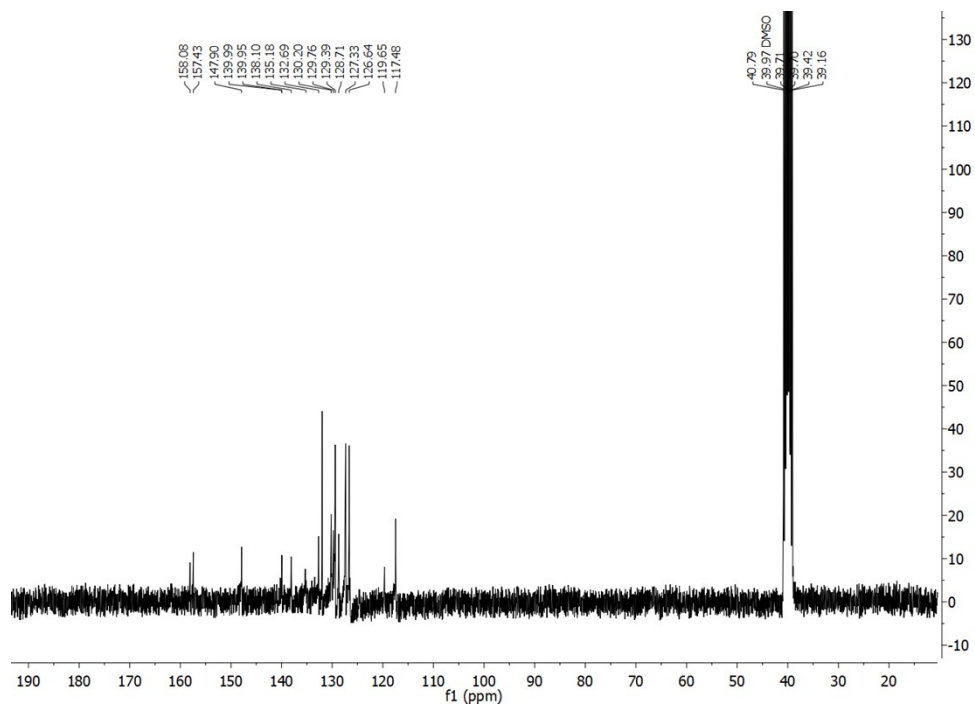

**Fig. S3:**  $^{13}\text{C}$  NMR spectrum of HBTC in  $\text{DMSO-d}_6$

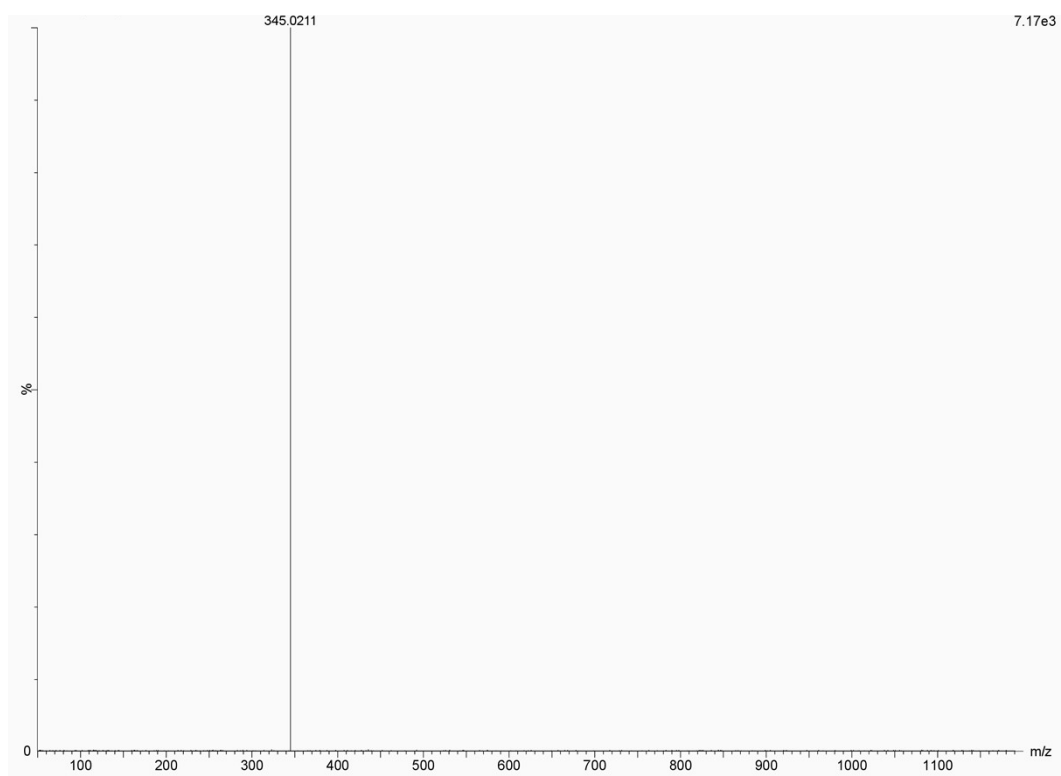

**Fig. S4:** HRMS of probe HBTC

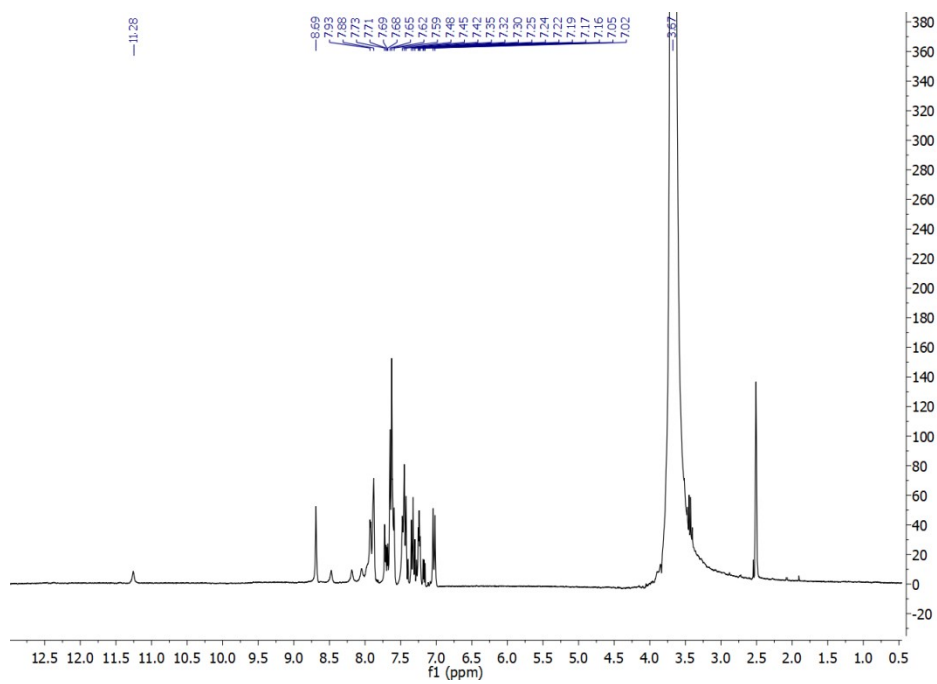

**Fig. S5:**  $^1\text{H}$  NMR spectrum of the HBTC with  $\text{Al}^{3+}$  in  $\text{DMSO-d}_6$

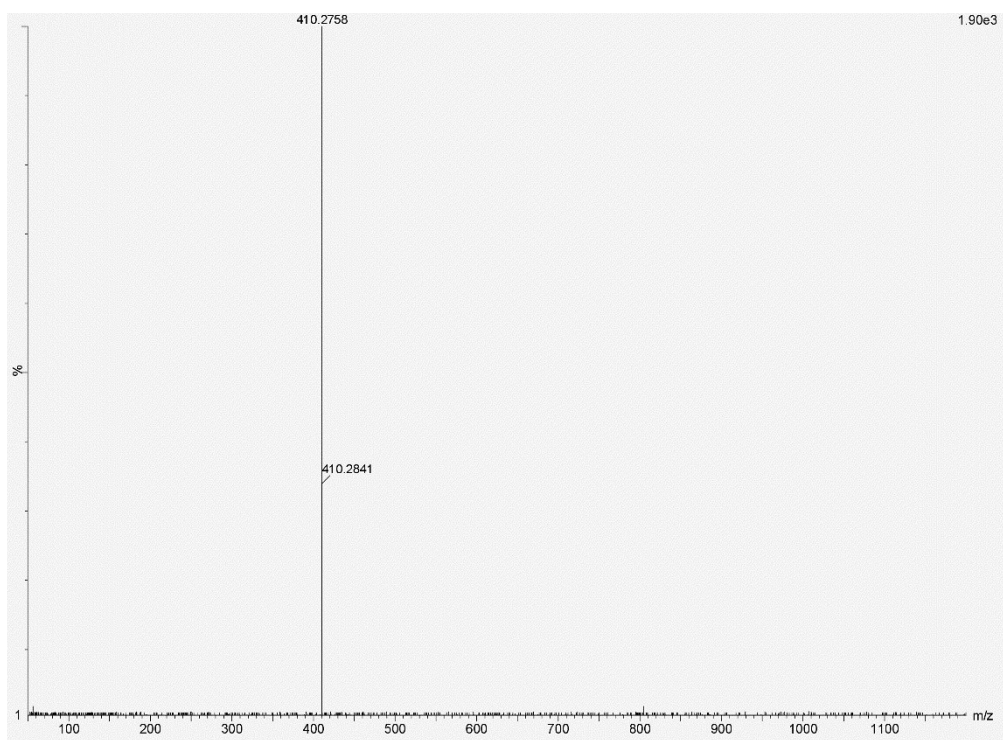

**Fig. S6:** HRMS spectrum of  $\text{HBTC-Al}^{3+}$  complex

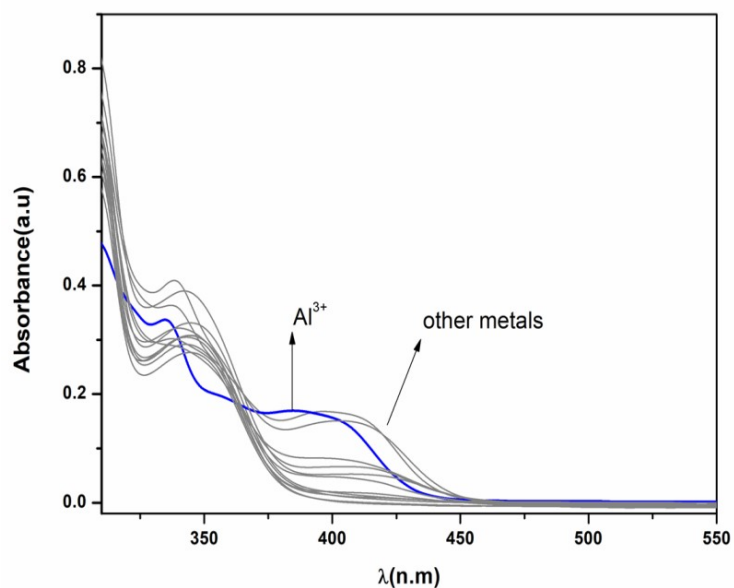

**Fig. S7:** UV-Vis spectra of HBTC (20  $\mu\text{M}$ ) in presence of 40  $\mu\text{M}$  various metal ions i.e.  $\text{Ca}^{2+}$ ,  $\text{Mg}^{2+}$ ,  $\text{Al}^{3+}$ ,  $\text{Mn}^{2+}$ ,  $\text{Fe}^{3+}$ ,  $\text{Cr}^{3+}$ ,  $\text{Co}^{2+}$ ,  $\text{Ni}^{2+}$ ,  $\text{Cu}^{2+}$ ,  $\text{Zn}^{2+}$ ,  $\text{Pb}^{2+}$ ,  $\text{Cd}^{2+}$  and  $\text{Hg}^{2+}$  in ACN/ $\text{H}_2\text{O}$  (4/1, v/v, pH = 7.2) solution

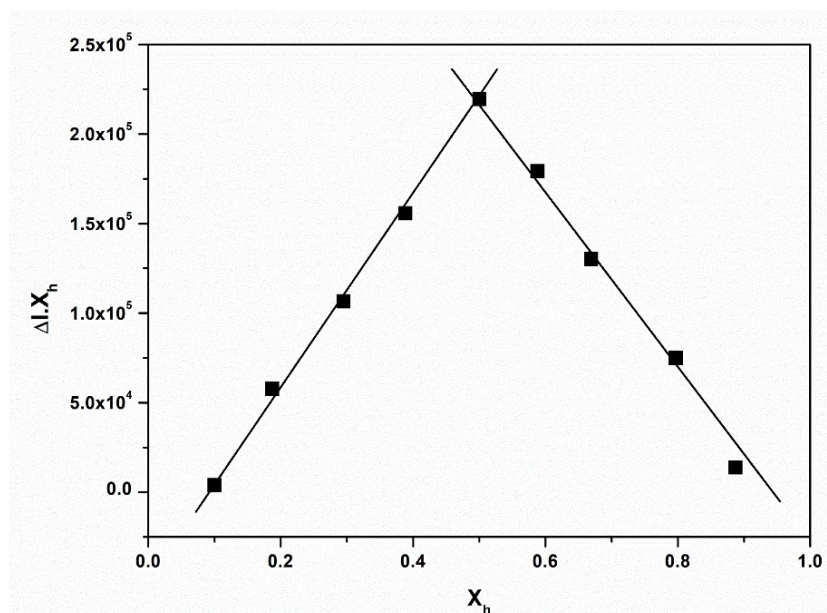

**Fig. S8:** Job's plot for HBTC (10  $\mu\text{M}$ ) with  $\text{Al}^{3+}$  in 10 mM HEPES buffer solution (pH = 7.2) ( $\lambda_{\text{ex}} = 384 \text{ nm}$ ); where  $X_h$  is the mole fraction of the host and  $\Delta I$  indicates the change of emission intensity at 480 nm

### Determination of association constant:

Binding constant was calculated according to the Benesi-Hildebrand equation.  $K_a$  was calculated following the equation stated below.

$$1/(F-F_0) = 1/\{K_a(F_{\max}-F_0) [M^{n+}]^x\} + 1/[F_{\max}-F_0]$$

Here  $F_0$ ,  $F$  and  $F_{\max}$  indicate the emission in absence of, at intermediate and at infinite concentration of metal ion respectively.

Plot of  $1/[F-F_0]$  vs.  $1/[Al^{3+}]$  gives a straight line indicating 1:1 complexation between HBTC and  $Al^{3+}$  where  $K_a$  is found to be  $3.04 \times 10^4 M^{-1}$  for HBTC.

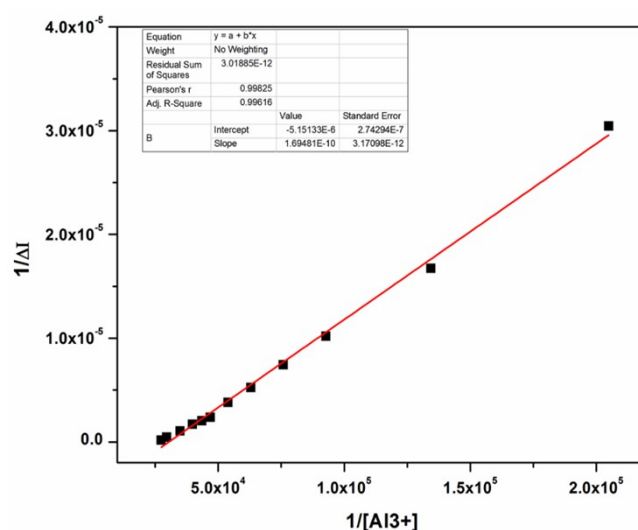

**Fig. S9:** Benesi-Hildebrand plot from fluorescence titration data of HBTC (20  $\mu M$ ) with  $Al^{3+}$

### Determination of limit of detection:

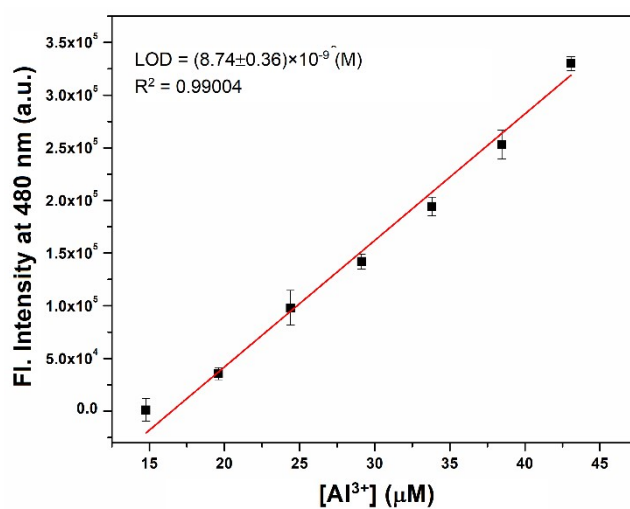

**Fig. S10:** Linear response curve of HBTC at 480 nm depending on the  $Al^{3+}$  concentration

**Table S1: Fluorescence lifetime data**

| Comps.                | Quantum yield ( $\phi$ ) | $\tau$ (ns) | $k_r$ ( $10^8 \times s^{-1}$ ) | $k_{nr}$ ( $10^8 \times s^{-1}$ ) |
|-----------------------|--------------------------|-------------|--------------------------------|-----------------------------------|
| HBTC                  | 0.001                    | 1.42        | 0.008                          | 7.04                              |
| HBTC-Al <sup>3+</sup> | 0.196                    | 5.14        | 0.381                          | 1.564                             |

Radiative rate constant  $K_r$  and total non-radiative rate constant  $K_{nr}$  have been calculated using the equation  $\tau^{-1} = K_r + K_{nr}$  and  $K_r = \phi_f / \tau$

**Determination of fluorescence quantum yield:**

The luminescence quantum yield was determined using coumarin 153 as reference dye. The compounds and the reference dye were excited at the same wavelength, maintaining nearly equal absorbance ( $\sim 0.1$ ), and the emission spectra were recorded. The area of the emission spectrum was integrated using the software available in the instrument and the quantum yield is calculated according to the following equation:

$$\phi_S / \phi_R = [A_S / A_R] \times [(Abs)_R / (Abs)_S] \times [n_S^2 / n_R^2]$$

where,  $\phi_S$  and  $\phi_R$  are the luminescence quantum yields of the sample and reference, respectively.  $A_S$  and  $A_R$  are the area under the emission spectra of the sample and the reference respectively,  $(Abs)_S$  and  $(Abs)_R$  are the respective optical densities of the sample and the reference solution at the wavelength of excitation, and  $n_S$  and  $n_R$  are the values of refractive index for the respective solvent used for the sample and reference.

We calculated the quantum yields of HBTC and HBTC-Al<sup>3+</sup> using the abovementioned equation; the values are found 0.001 and 0.196 respectively.

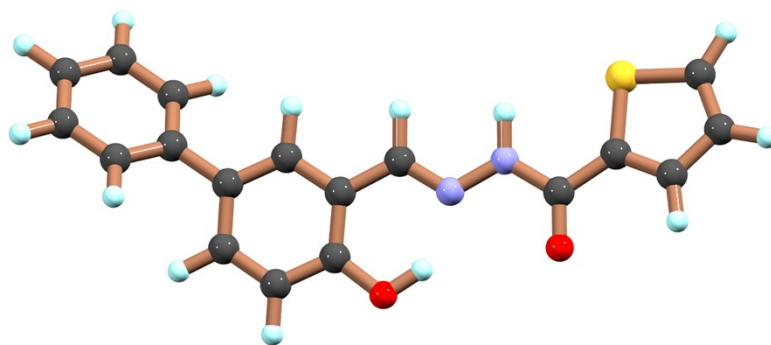

**Fig. S11:** Optimized structure of HBTC by DFT/B3LYP/6-31+G(d) method

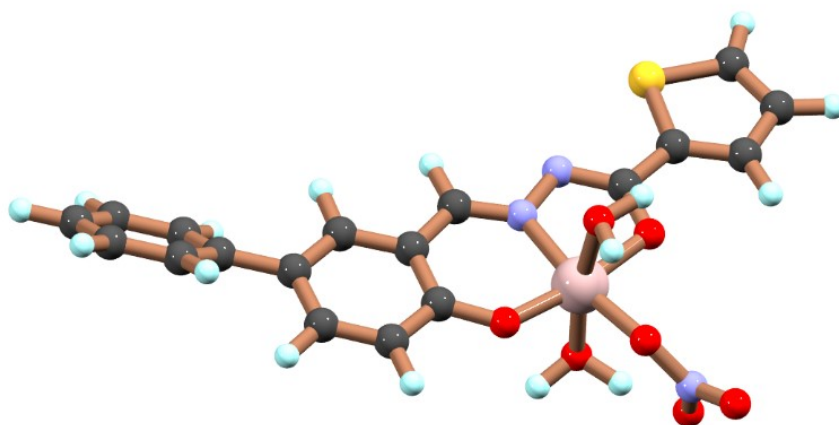

**Fig. S12:** Optimized structure of HBTC-Al<sup>3+</sup> complex by DFT/B3LYP method



**Table S2:** Energy and compositions of some selected molecular orbitals of HBTC-Al<sup>3+</sup> complex.

| MO      | Energy | % of composition |    |
|---------|--------|------------------|----|
|         |        | HBTC             | Al |
| LUMO+5  | 0.46   | 99               | 1  |
| LUMO+4  | -0.07  | 100              | 0  |
| LUMO+3  | -0.61  | 100              | 0  |
| LUMO+2  | -0.84  | 100              | 0  |
| LUMO+1  | -1.38  | 98               | 2  |
| LUMO    | -2.01  | 100              | 0  |
| HOMO    | -5.52  | 99               | 1  |
| HOMO-1  | -6.06  | 100              | 0  |
| HOMO-2  | -6.83  | 100              | 0  |
| HOMO-3  | -6.91  | 100              | 0  |
| HOMO-4  | -6.97  | 100              | 0  |
| HOMO-5  | -7.05  | 100              | 0  |
| HOMO-6  | -7.32  | 98               | 2  |
| HOMO-7  | -7.75  | 99               | 1  |
| HOMO-8  | -7.76  | 100              | 0  |
| HOMO-9  | -8.16  | 97               | 3  |
| HOMO-10 | -8.6   | 100              | 0  |

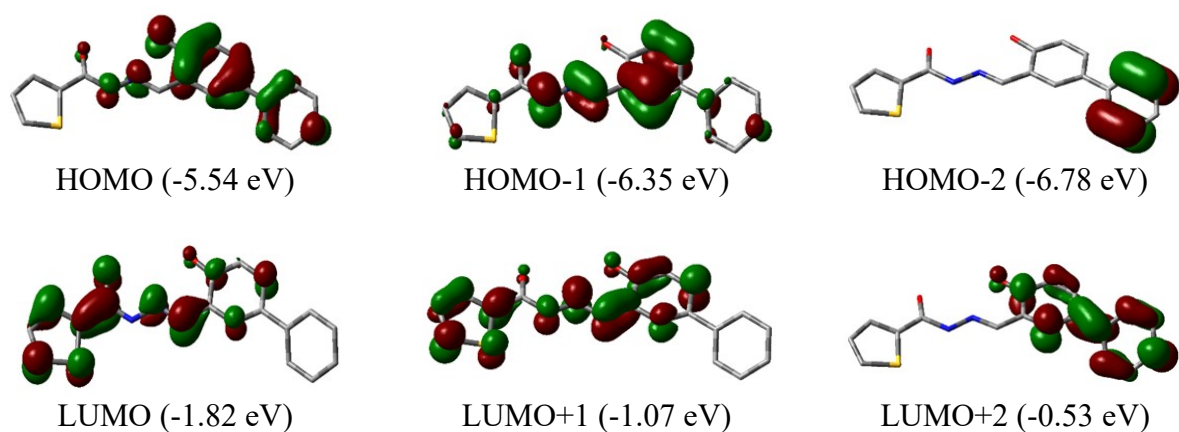

**Fig. S13:** Contour plot of some selected molecular orbitals of HBTC

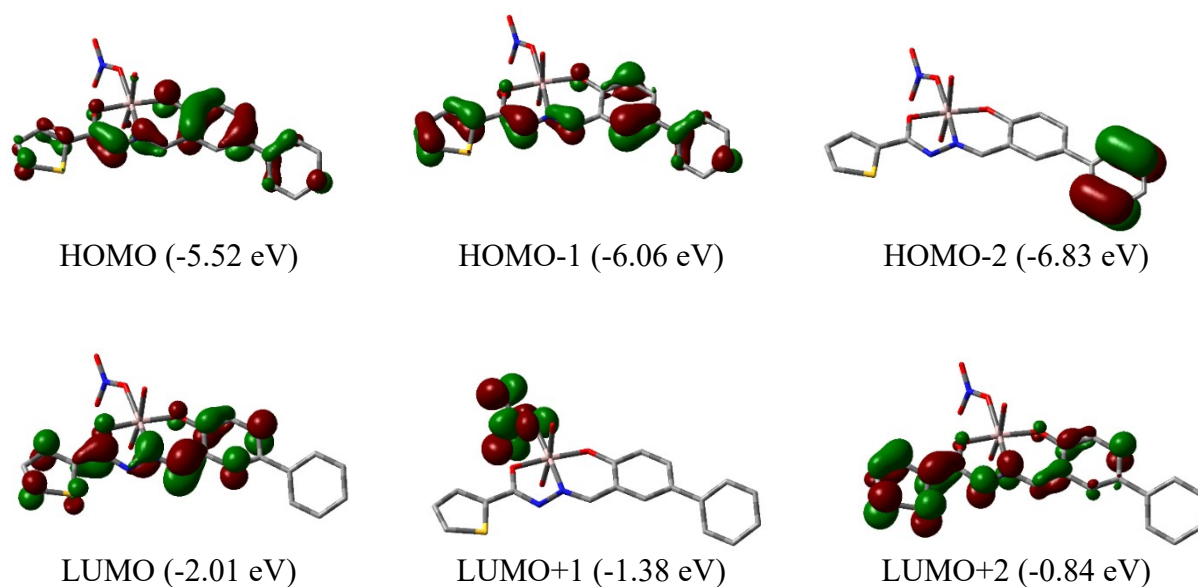

**Fig. S14:** Contour plot of some selected molecular orbitals of HBTC-Al<sup>3+</sup>

**Table S3:** Vertical electronic excitations of HBTC and HBTC-Al<sup>3+</sup> calculated by TDDFT/CPCM method

| Comps.                | E (eV) | $\lambda$ (nm) | Osc. Strength (f) | Transition          | Character                 |
|-----------------------|--------|----------------|-------------------|---------------------|---------------------------|
| HBTC                  | 4.0500 | 306.13         | 0.6054            | (88%) HOMO-1→LUMO   | $\pi \rightarrow \pi^*$   |
|                       | 3.4153 | 363.03         | 0.3381            | (97%)HOMO→LUMO      | $\pi \rightarrow \pi^*$   |
|                       | 4.5817 | 270.61         | 0.3756            | (80%) HOMO→LUMO+2   | $\pi \rightarrow \pi^*$   |
|                       | 4.9552 | 250.21         | 0.4244            | (65%)HOMO-1→LUMO+1  | $\pi \rightarrow \pi^*$   |
|                       | 4.2420 | 292.28         | 0.1656            | (82%) HOMO→LUMO+1   | $\pi \rightarrow \pi^*$   |
| HBTC-Al <sup>3+</sup> | 3.0712 | 403.70         | 0.5377            | (98%) HOMO→LUMO     | L( $\pi$ ) → L( $\pi^*$ ) |
|                       | 3.6314 | 341.42         | 0.6558            | (97%) HOMO-1→LUMO   | L( $\pi$ ) → L( $\pi^*$ ) |
|                       | 4.8482 | 255.73         | 0.2353            | (67%) HOMO-1→LUMO+2 | L( $\pi$ ) → L( $\pi^*$ ) |
|                       | 4.4416 | 279.14         | 0.2155            | (58%) HOMO→LUMO+3   | L( $\pi$ ) → L( $\pi^*$ ) |
|                       | 5.6347 | 220.04         | 0.1212            | (57%) HOMO-3→LUMO+2 | L( $\pi$ ) → L( $\pi^*$ ) |

## Cell-bio imaging:

### MTT assay

Triple negative breast cancer cell lines MDA MB-231 were evaluated for cytotoxicity with HBTC and HBTC-Al<sup>3+</sup> complex. MB-231 cells were seeded in 96 well plate at a density of  $5 \times 10^3$  cells per well followed by incubation at 37°C for 24 h at a 5% CO<sub>2</sub> atmosphere. The cells were separately treated with increasing doses of HBTC and HBTC-Al<sup>3+</sup> complex concentrations (0, 1, 12.5, 25, 50, 100, 150, 200)  $\mu$ M, along with control for 24 h. Al<sup>3+</sup> was treated in aqueous medium while the receptor HBTC was dissolved in DMSO but final concentration of DMSO was maintained below 1%. After 24h, methyl tetrazolium dye (MTT) (5 mg/mL) solution was added to each well (10  $\mu$ l/well). The plates were incubated under dark condition in CO<sub>2</sub> atmosphere at 37°C for 3 h. Then 100  $\mu$ L DMSO was added to each well to solubilize the formazan crystals and the plates were shaken briefly before quantification at 570 nm with the help of a multi-mode reader (SpectraMax i3x, Molecular devices). IC<sub>50</sub> value of HBTC was determined by plotting a non-linear regression curve between the log of concentration of HBTC and O.D value at 570 nm. Untreated cells were served as 100% viable.

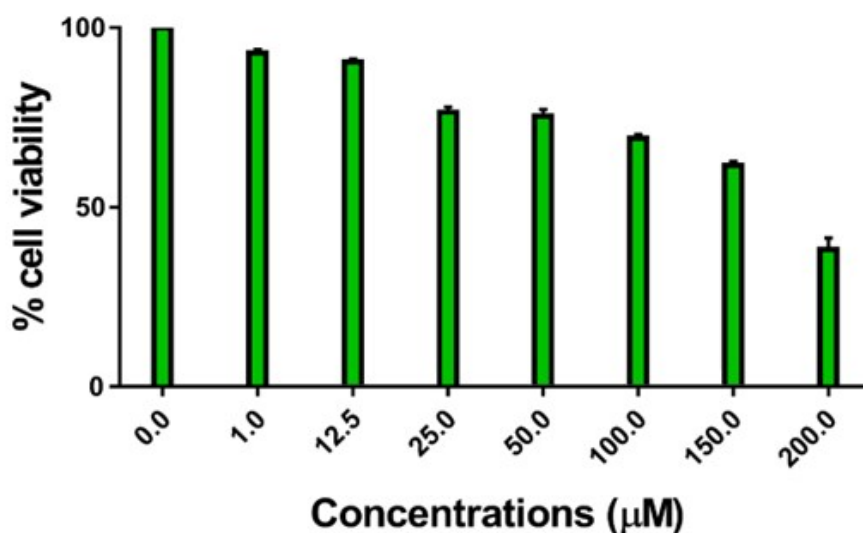

**Fig. S15:** MTT assay of HBTC on breast cancer cell lines (MDA-MB231)

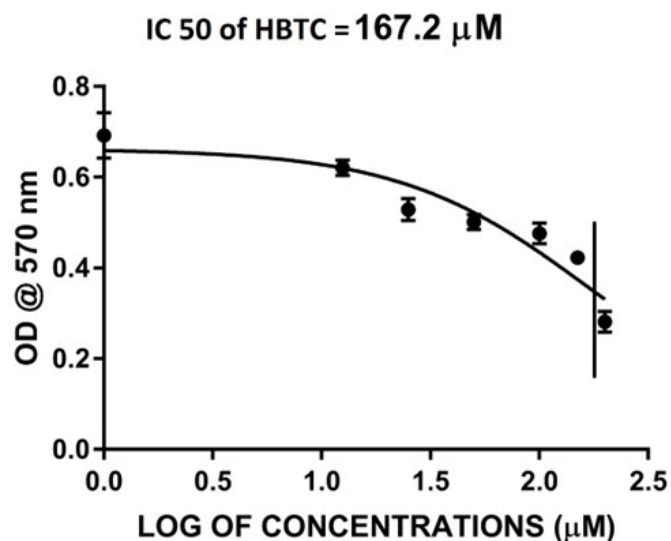

**Fig. S16:** IC<sub>50</sub> dose of the receptor HBTC in breast cancer cell lines (MDA-MB231)

**Cell bio imaging.** In a six well plate containing 22×22 mm glass cover slips placed at the bottom of the well, the MDA MB 231 cells were seeded and allowed to adhere overnight. 15  $\mu$ M of the HBTC as well as HBTC-Al<sup>3+</sup> was added to the respective well containing cells along with a separate control. Then fixation of the cells was done with methanol and washed with 0.5% phosphate buffer saline tween (PBST) twice and then with 1 × PBS thrice. The cover slips were then mounted on a glass slide by glycerol and were observed under a fluorescence microscope (Leica DM4000 B, Germany) at 40x magnification.

**Table S4:** Comparison of solvent systems and limit of detection (LOD) of the receptor (HBTC) with some recently reported fluorescence organic probes for the detection of Al<sup>3+</sup>

| Chemosensors                                                                        | Solvent system                                                  | LOD                     | References                                           |
|-------------------------------------------------------------------------------------|-----------------------------------------------------------------|-------------------------|------------------------------------------------------|
| 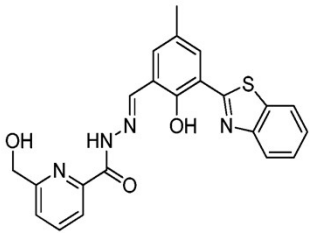   | CH <sub>3</sub> OH/H <sub>2</sub> O (1/9, v/v, pH = 7.3, 25 °C) | 6.72×10 <sup>-8</sup> M | <i>New J. Chem.</i> , 2015, <b>39</b> , 8582-8587    |
|    | EtOH/H <sub>2</sub> O (1:9, v/v, pH = 5.3)                      | 6.75×10 <sup>-8</sup> M | <i>RSC Adv.</i> , 2020, <b>10</b> , 21629-21635      |
|   | MeOH-H <sub>2</sub> O (9:1, v/v)                                | 4.78 μM                 | <i>Anal. Methods</i> , 2021, <b>13</b> , 4266-4279   |
|  | Acetonitrile-water (2:1, v/v) of pH, 7.2 (HEPES buffer)         | 0.62 μM                 | <i>J. Mol. Struct.</i> , 2022, <b>1250</b> , 131870  |
|  | HEPES buffer (1% EtOH, pH = 7.04).                              | 2.94×10 <sup>-8</sup> M | <i>Dalton Trans.</i> , 2015, <b>44</b> , 11352-11359 |

|                                                                                    |                                                       |                        |                                                        |
|------------------------------------------------------------------------------------|-------------------------------------------------------|------------------------|--------------------------------------------------------|
| 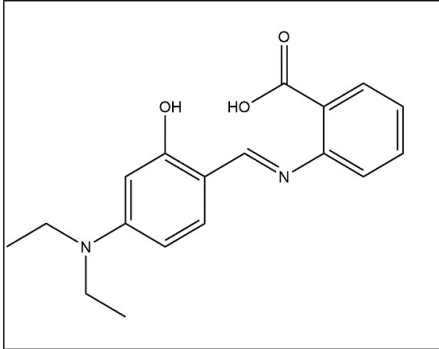  | Water:CH <sub>3</sub> OH =1:1<br>(v/v) pH 7.0         | 2.9×10 <sup>-7</sup> M | <i>New J. Chem.</i> , 2016, <b>40</b> ,<br>171-178     |
|   | bis-Trisbuffer<br>solution, pH 7.0                    | 0.19 mM                | <i>New J. Chem.</i> , 2017, <b>41</b> ,<br>15590-15600 |
|   | MeOH/water<br>(v/v,1:1, pH 6.0).                      | 31.2 nM                | <i>Anal. Methods</i> , 2019, <b>11</b> ,<br>5598-5606. |
|  | Acetonitrile/H <sub>2</sub> O<br>(4/1, v/v, pH = 7.2) | 0.5×10 <sup>-9</sup> M | <i>Present work</i>                                    |
